# Supplementary material for: Associations of Neuromelanin in the Substantia Nigra with Antipsychotic Response in Schizophrenia
Source: Research Square preprint supplement (doi:10.21203/rs.3.rs-6323439/v1), 2025-04-04
Supplement: Supplementary file 1 [file b35151cac1ab6f4488f2b612.docx]

**Supplementary material 1) Methods: The definition of standard antipsychotic treatment, antipsychotic treatment response, and failure**

Standard antipsychotic treatment was defined as a daily dosage equivalent to ≥400 mg of chlorpromazine (CPZ) for ≥6 weeks. Treatment response was defined by: a) a Clinical Global Impression Severity (CGI-S) score of ≤3, b) a score of ≤5 (moderate-severe) on two positive symptom criteria or ≤4 (moderate) on three positive symptom criteria of the Positive and Negative Syndrome Scale (PANSS). and c) no symptomatic relapse during the previous 3 months. Antipsychotic treatment failure was defined by a) a CGI-S score of ≥4 (moderate) and b) a score of ≥4 (moderate) on two PANSS positive symptom criteria after standard antipsychotic treatment.

**Supplementary material 2) Methods: The exclusion criteria**

The exclusion criteria for all groups were as follows: 1) active substance abuse or dependence during the past 6 months, 2) positive urine drug screen for drugs of abuse at inclusion or before MRI scanning, 3) history of head trauma resulting in loss of consciousness for >30 minutes, 4) unstable physical illness, 5) neurological disorder, and 6) current use of lamotrigine, topiramate, or memantine due to potential glutamate modulating properties [19](https://paperpile.com/c/0PkLxJ/OUOWZ). However, any concomitant medication except for those as described in the exclusion criterion 6), such as benzodiazepines, antidepressants and mood stabilizers, were allowed to use in this study to avoid symptomatic worsening of the participants. The patient groups and HCs were matched for age and sex.

**Supplementary material 3)** **Methods: Sample Size Estimation**

The sample size was calculated based on an effect size reported from a previous study that compared SN NM levels in patients with schizophrenia who presented severe positive symptoms (PANSS Positive subscale scores ≥19) to HCs (Cohen’s d = 0.92) (13), which resulted in the estimated number of 24 subjects in each group (alpha = 0.05, 1-beta = 0.85). Thus, we aimed to enroll 24 participants per group.

**Supplementary material 4)** **Methods: MRI acquisition**

Participants underwent a 3D inversion recovery prepared T1-weighted magnetic resonance imaging (MRI) scan (Axial MRI 3D brain volume (BRAVO), repetition time (TR) = 6.4, echo time (TE) = 2.8, inversion time (TI) = 650 ms, flip angle = 8°, field of view (FOV) = 230 mm, matrix = 256 × 256, slice thickness = 0.9 mm). NM-MRI imaging was acquired using a two-dimensional gradient echo sequence with magnetization transfer contrast (TR = 260 ms; TE = 3.72 ms; flip angle = 40°; in-plane resolution = 0.43 x 0.43 mm2; partial brain coverage with FOV = 220x103; matrix 240 x 512; number of slices = 8; slice thickness = 3 mm; slice gap = 3 mm; magnetization transfer frequency offset = 1200 Hz; number of excitations = 8; acquisition time = 17.88 min). The protocol for slice prescription was to align the image stack along the line between the anterior and posterior commissures and to place the top slice 3 mm above the floor of the third ventricle. This protocol covered the SN-containing portions of the midbrain and surrounding structures.

**Supplementary material 5)** **Methods: Permutation Test for Multiple Comparisons Correction**

This generated a null distribution of spatial extent values (k) from 10,000 permuted datasets. The probability of observing the spatial extent (k) of the true effect by chance was then calculated by comparing it to the null distribution. This method corrects for multiple comparisons by determining whether the observed spatial extent (k) exceeds what would be expected by chance (p<0.05, corrected; 10,000 permutations).

**Supplementary Material 6) Methods: Correlation Analyses Between Clinical and Cognitive Measurements and SN CNR**

We examined the association between NM-MRI CNR, defined as the average voxel signal showing significant differences between the whole patient group and HC group in the voxel-wise analysis, and participants’ symptom severity and cognitive function measures. These measures included chlorpromazine (CPZ) equivalent dose, PANSS total and subscale scores, RBANS total scale and subscale scores, CGI-S scores, EXIT scores, JART scores, and GAF scores, analyzed within each group and the whole patient group. Correlation analysis methods were selected based on the normality of each measure, as determined by the Shapiro-Wilk test (i.e., Spearman’s correlation for non-normal distributions and Pearson’s correlation for normal distributions).

**Supplementary material 7) Results: Clinico-demographic data**

The clinico-demographic information is shown in Table 1a, and the clinical severity is shown in Table 1b. A total of 100 participants were included in the present study (33 patients with TRS, 35 patients with remission, and 32 HCs). Five participants were unable to complete the MRI scan for the following reasons: discomfort with the MRI, noise intolerance, claustrophobia, injury, and difficulties during scanning. The data of one participant was missing due to a technical problem. Another participant's data was excluded due to poor scan quality following a visual inspection. For three other participant data, the SN mask was misaligned, failing to accurately detect the SN location. Ultimately, we included twenty-four matched participants in each group, for a total of seventy-two participants in the analyses. There were no significant differences in age or sex (i.e., number of females) among the groups (Table 1a). The TRS group presented with higher severity than the SZ-R group (Table 1b). Additionally, the RBANS scores revealed the order of cognitive abilities, with the HC group scoring the highest, followed by the SZ-R group, and the TRS group showing the lowest performance. EXIT and JART scores were higher in the HCs compared to the SZ-R group. GAF score was lower in the TRS group compared to the SZ-R and HC groups and in the SZ-R group compared to the HC group.
